# Supplementary material
Source: publisher figshare collection journal article supplement (https://sage.figshare.com/ndownloader/files/17722628)
Supplement: Supplementary file 1 [file 17722628]

## Sheet: Clear Lake core CLR17-1
Clear Lake (core CLR17-1)
Core ID	Midpoint Depth (cm)	Weight (g)	210Pb activity (Bq/kg)	210Pb uncertainty (Bq/kg)	226Ra activity (Bq/kg)	226Ra uncertainty (Bq/kg)	137Cs activity (Bq/kg)	137Cs uncertainty (Bq/kg)	Year AD	Year AD uncertainty	Notes
CLR17-1	0.25	2	165	26.1	2.29	5.3	31.9	7.29	2016.55	1
CLR17-1	0.75	0.77	344	74	11	13.9	114	20.6	2006.79	1
CLR17-1	1.25	0.746	673	73.9	28.8	13.6	144	19.5	2005.47	1
CLR17-1	2.25	1.0051	559	58	24.6	10.3	99.4	16.5	2000.61	1
CLR17-1	2.75	0.8171	613	69	34.1	13	173	17.9	1998.52	1
CLR17-1	3.75	0.8465	401	66.9	31.1	7.19	71.7	19.3	1994.48	1
CLR17-1	4.75	1.1906	281	48.3	48.6	8.7	154	13.3	1990.42	1
CLR17-1	5.75	1.08	235	52.4	21	10.3	341	18.4	1987.52	1
CLR17-1	6.75	1.1511	377	48.4	32.6	9.45	258	17.6	1983.23	1
CLR17-1	7.75	0.9672	376	57.8	43.5	11.3	190	18.4	1977.86	2
CLR17-1	8.75	1.7065	299	33.7	21.7	6.76	617	16.3	1967.21	2
CLR17-1	9.25	1.4661	106	19.7	38.1	6.17	637	16	1964.28	2	137Cs peak
CLR17-1	9.75	1.2603	192	23.7	43	6.28	101	10.6	1962.58	2
CLR17-1	10.25	0.9336	217	29	36	9.11	66.6	13.9	1960.42	2
CLR17-1	13.25	1.2802	163	21.3	29.8	6.8	70.3	9.04	1937.14	7
CLR17-1	15.25	0.9046	145	25.2	56.6	9.96	79.2	14.6	1922.58	8
CLR17-1	17.25	0.8549	155	27.8	74.4	9.96	93.6	14.9	1899.05	17
CLR17-1	20.25	0.9872	43	23.5	109	9.33	286	15.8			210Pb background
CLR17-1	23.25	2.8686	71.2	10.4	49.8	3.64	130	6.18			210Pb background
CLR17-1	25.25	2.5277	60.5	10.2	44.5	4.05	15.3	4.55			210Pb background

## Sheet: Columbine Lake core COL17-3
Columbine Lake (core COL17-3)
Core ID	Midpoint Depth (cm)	Weight (g)	210Pb activity (Bq/kg)	210Pb uncertainty (Bq/kg)	226Ra activity (Bq/kg)	226Ra uncertainty (Bq/kg)	137Cs activity (Bq/kg)	137Cs uncertainty (Bq/kg)	Year AD	Year AD uncertainty	Notes
COL17-3	0.25	0.6951	603	83.5	35.5	15	18.8	20.5	2015.3	1
COL17-3	0.75	0.5905	663	95	31.8	17.8	14.2	22.7	2012.02	1
COL17-3	1.25	0.8221	621	68.7	56.8	13	139	18.2	2006.71	1
COL17-3	1.75	0.905	584	67.4	23	12.2	280	20	2000.17	1
COL17-3	2.25	1.0051	399	55.1	45.3	10.9	381	20	1992.98	1
COL17-3	2.75	1.0383	294	56.5	60.1	10.7	808	24.7	1986.87	2
COL17-3	3.25	1.0585	280	56.5	18.4	12	1430	29.8	1980.87	2	137Cs peak
COL17-3	3.75	1.3386	149	44.3	26.7	8.66	514	18.4	1974.53	3
COL17-3	4.75	1.2752	116	43.6	39.1	8.89	24.2	12.6	1967.18	5
COL17-3	5.75	1.6975	130	33.6	41.5	6.69	45.6	8.44	1955.67	7
COL17-3	6.75	1.9099	128	29.9	45	6.19	7.94	7.85	1931.63	16
COL17-3	7.75	1.7413	93.2	18.6	44	6.56	6.61	8.17	1884.56	53
COL17-3	9.25	1.3412	33	35.3	93.3	8.36	0	0			210Pb background
COL17-3	10.25	0.7084	72.9	44.9	89.1	12.4	0	0			210Pb background
COL17-3	11.25	0.6999	120	44.4	134	12.7	40.3	14			210Pb background
COL17-3	12.25	0.8542	96.1	36.3	66.9	9.73	5.51	12.1			210Pb background

## Sheet: Crater Lake core CTR16-1
Crater Lake (core CTR16-1)
Core ID	Midpoint Depth (cm)	Weight (g)	210Pb activity (Bq/kg)	210Pb uncertainty (Bq/kg)	226Ra activity (Bq/kg)	226Ra uncertainty (Bq/kg)	137Cs activity (Bq/kg)	137Cs uncertainty (Bq/kg)	Year AD	Year AD uncertainty	Notes
CTR16-1	0.25	0.6112	604.256	34.3077	54.529	10.8671	76.137	6.59168	2015	1
CTR16-1	0.75	0.5232	626.747	24.0869	43.0971	7.86644	73.7783	4.42724	2008.54	1.32938	Used in age depth model
CTR16-1	1.25	0.6202	526.952	24.8177	43.5435	7.89815	68.8254	5.02519	2000.09	1.8732
CTR16-1	2.25	0.9175	187.094	17.6273	37.6869	6.21032	24.7201	3.07368	1986.94	2.55085
CTR16-1	3.25	0.8077	303.915	18.1332	36.1863	6.16353	32.6205	3.06708	1968.82	3.71143
CTR16-1	4.25	0.799	83.3861	17.4379	50.4245	8.20253	5.92446	3.13748	1950.2	5.59425	Used in age depth model
CTR16-1	6.25	0.9305	97.2256	16.0412	34.3669	6.00094	0.737756	2.33781	1923.81	9.67821
CTR16-1	8.25	0.832	52.197	13.6723	28.7787	5.65533	-3.45954	2.78911	1903.25	14.7639	Used in age depth model
CTR16-1	10.25	0.64	22.9561	17.7738	24.0296	6.02802	2.1566	3.50531	1843.87	60.0572
CTR16-1	14.25	0.7273	35.7803	16.7179	31.25	6.36355	-5.48146	3.48408			210Pb background
CTR16-1	18.25	0.8468	34.6302	9.7588	33.7628	5.796	0.484014	2.39561			210Pb background
